# Supplementary material for: A solar-driven photocatalytic fuel cell with dual photoelectrode for simultaneous wastewater treatment and hydrogen production
Source: Royal Society of Chemistry journal article supplement (doi:10.1039/c4ta06604a), 2014-12-11
Supplement: c4ta06604a1.pdf [file c4ta06604a1.pdf]

## Supplementary Information

# **A solar-driven photocatalytic fuel cell with dual photoelectrode for simultaneous wastewater treatment and hydrogen production**

Zhongyi Wu, Guohua Zhao,\* Yajun Zhang, Jian Liu, Ya-nan Zhang and Huijie Shi.

Department of Chemistry, Key Laboratory of Yangtze River Water Environment,  
Tongji University, Shanghai 200092, People's Republic of China

\*Corresponding Author: *Phone:* (86)-21-65988570-8244. *Fax:* (86)-21-65982287 .

*E-mail:* [g.zhao@mail.tongji.edu.cn](mailto:g.zhao@mail.tongji.edu.cn).

### **Pretreatment of FTO**

FTO sheets, cut into samples of size 1.5cm · 5cm, were degreased by immersed into piranha solution for 30 min. Then rinsed by deionized water and dried in the air.

### **Preparation of TiO<sub>2</sub> NTs/Ti**

Ti sheets, cut into samples of size 1.5cm \* 5cm, were degreased by sonicating in acetone, ethanol, deionized water in turn after polished, then dried in the air. The Ti sheets sample was etched in the HCl (SCRC, AR, 36.0-38.0%) solution (6mol L<sup>-1</sup>) for 20 min then electrochemical anodized by using a DC power supply (Sovotek, E5200-3) to control the experimental voltage and current. The anodization was divided into 2 steps. The first is to anodize in 0.5wt% HF (SCRC, AR, ≥40.0%) solution using a platinum foil counter electrode at room temperature and a voltage of 20V for 1h. The second is to anodize in the glycol solution (NH<sub>4</sub>F (SCRC, AR, ≥96%): H<sub>2</sub>O: Et(OH)<sub>2</sub> (SCRC, AR, ≥99.7%))=1:4:400,wt%) at the same conditions for 2h. After that, it was annealed in air atmosphere for 3h with the heating and cooling rates of 5 °C min<sup>-1</sup>.

### **Preparation of CdSe NPs/FTO**

Electrodeposition was carried out in a three-electrode configuration with FTO, Platinum wire and Hg/HgCl<sub>2</sub>, as working electrode, counter electrode and reference electrode, respectively. The electrodeposition bath solution contained 0.1 mol L<sup>-1</sup> CdSO<sub>4</sub> (SCRC, AR, ≥99.0%), 0.1 mmol L<sup>-1</sup> SeO<sub>2</sub> (SCRC, AR), and 0.1 mol L<sup>-1</sup> Na<sub>2</sub>SO<sub>4</sub> (Aladdin, AR, 99.0%). The applied potential was -1.1V vs SCE and the deposition time is 2 h. The CdSe NPs/FTO were rinsed thoroughly and annealed at 300 °C in N<sub>2</sub> atmosphere for 3 h.

### **Preparation of CdS NPs/FTO**

Electrodeposition was carried out in a three-electrode configuration with FTO, Platinum wire and Hg/HgCl<sub>2</sub>, as working electrode, counter electrode and reference

electrode, respectively. The electrodeposition bath solution contained  $0.2 \text{ mol L}^{-1} \text{ CdCl}_2$  (Aladdin, AR,  $\geq 99.0\%$ ) and  $0.05 \text{ mol L}^{-1} \text{ Na}_2\text{S}_2\text{O}_3$  (Enox, AR,  $\geq 99.0\%$ ) with adjusting the pH value to 2.1 by HCl solution ( $0.1 \text{ mol L}^{-1}$ ). The electrochemical configuration was placed in a thermostatted bath where the temperature was  $70^\circ\text{C}$ . The applied potential was  $-0.65 \text{ V}$  vs SCE and the deposition time is 1000 s. Then the CdS NPs/FTO were rinsed and annealed at  $500^\circ\text{C}$  in  $\text{N}_2$  atmosphere for 6 h with the heating and cooling rates of  $5^\circ\text{C min}^{-1}$ .

### **Preparation of $\text{Cu}_2\text{O}$ NPs/FTO**

A standard three-electrode system was used for  $\text{Cu}_2\text{O}$  nanoparticles deposition. An Ag/AgCl electrode in a saturated KCl (SCRC, AR,  $\geq 99.5\%$ ) solution was used as a reference electrode, a FTO as a work electrode and a platinum coil as a counter electrode. The electrolyte solution consisted of  $0.4 \text{ mol L}^{-1}$  cupric sulfate (SCRC, AR,  $\geq 99.0\%$ ) and  $3 \text{ mol L}^{-1}$  lactic acid (Aladdin, AR,  $\geq 85.0\%$ ), then its pH was adjusted 9.0 by  $4 \text{ mol L}^{-1}$  NaOH (Aladdin, AR,  $96.0\%$ ) solution with continuous stirring. The electrochemical deposition was performed potentiostatically with a potential of  $-0.3 \text{ V}$  (versus Ag/AgCl) for 30 min and the temperature of the electrolyte was kept at  $60^\circ\text{C}$  by water bath.

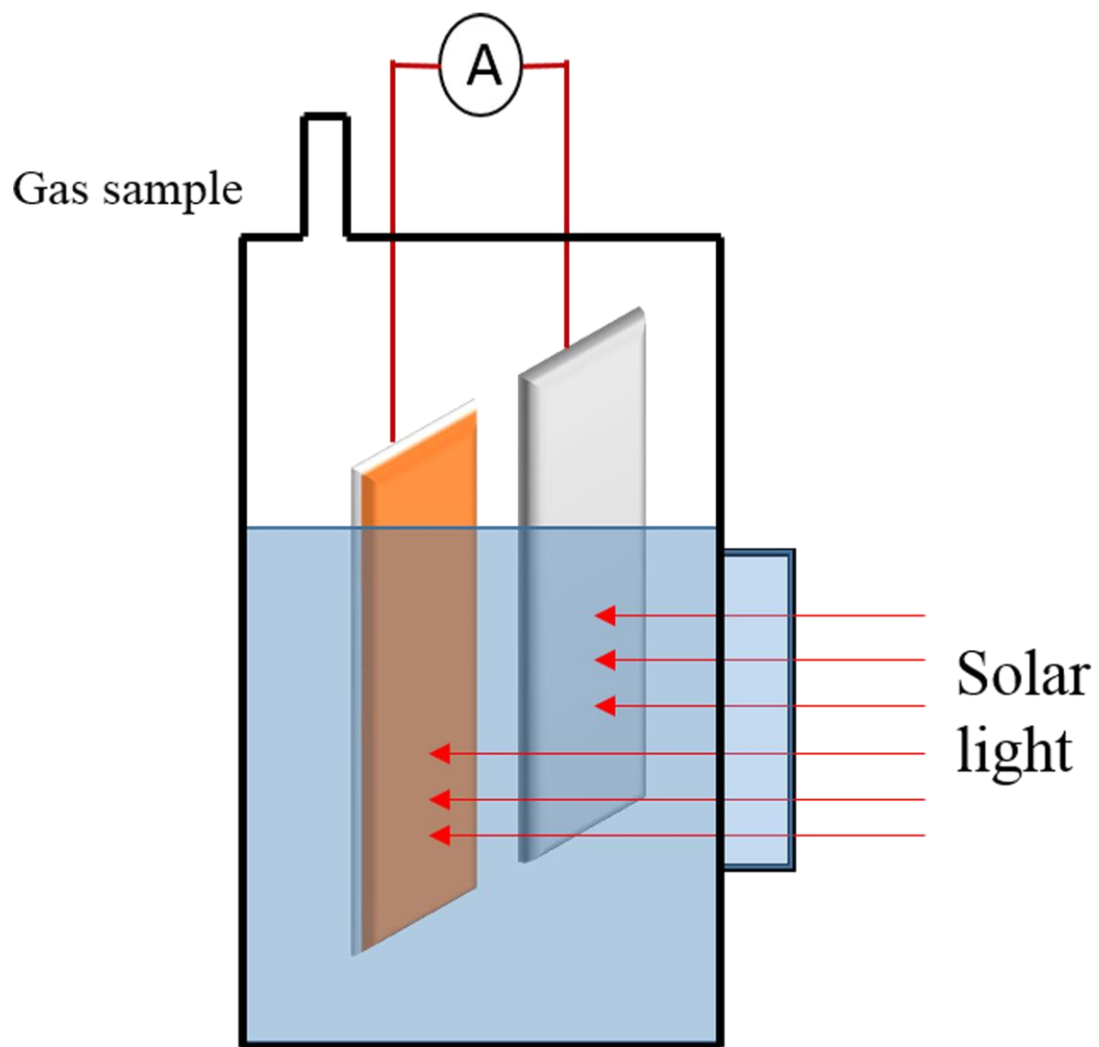

**Fig. S1** The reactor of the PFC.

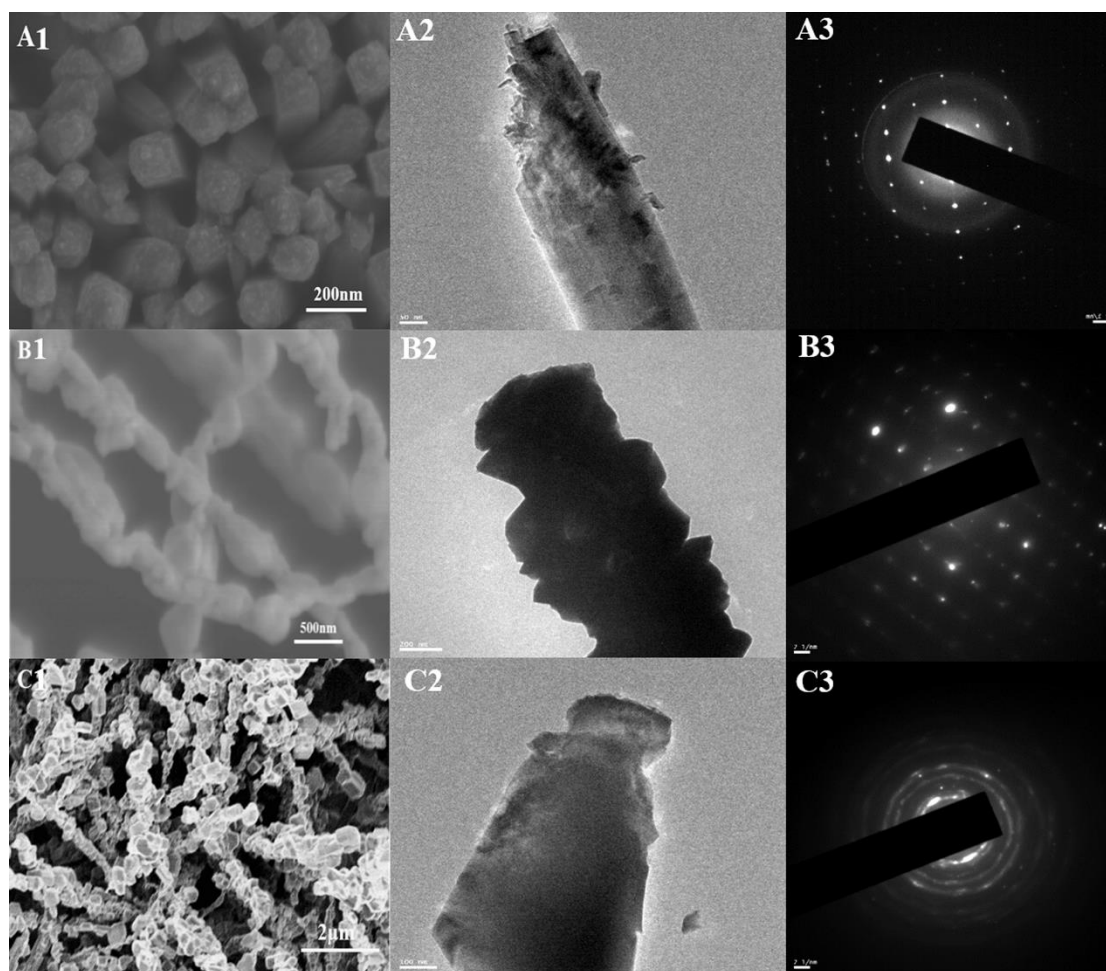

**Fig. S2** The SEM image, TEM image of TiO<sub>2</sub> NRS/FTO (A1-A3); Cu<sub>2</sub>O NWAs/Cu mesh (B1-B3) and C/ Cu<sub>2</sub>O NWAs/Cu mesh (C1-C3).

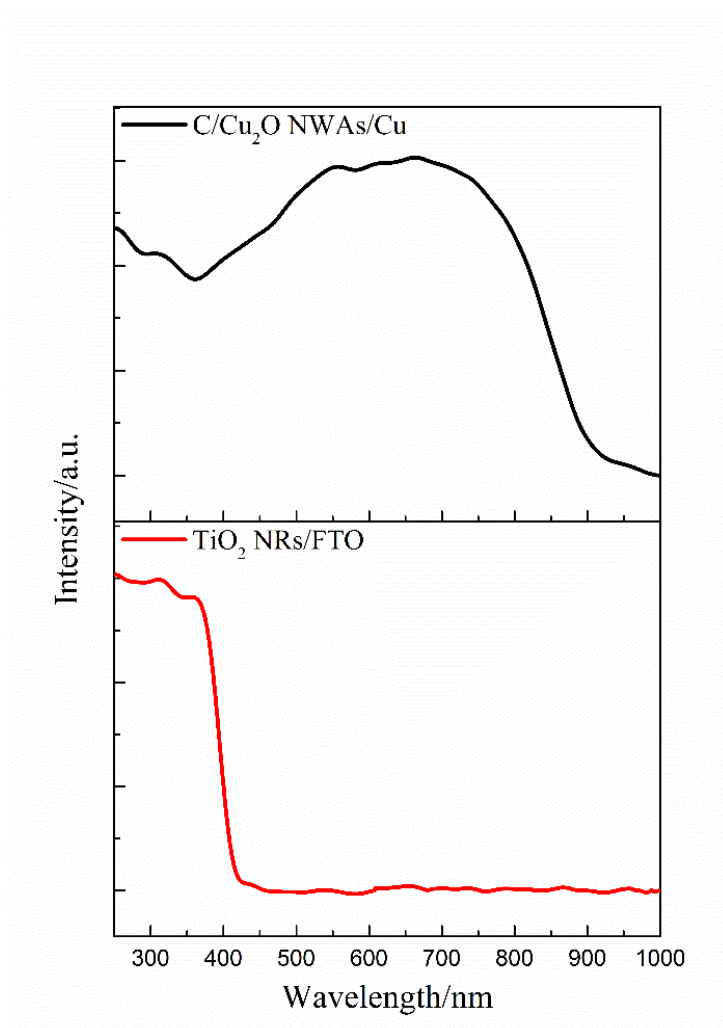

**Fig. S3** The UV-Vis absorption spectra of the C/Cu<sub>2</sub>O/Cu and TiO<sub>2</sub> NRs/FTO

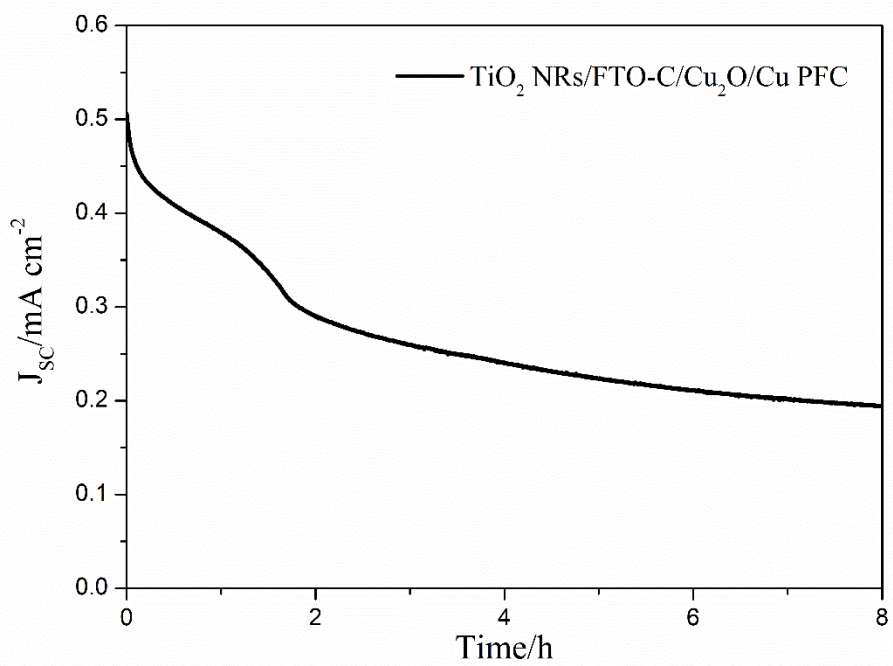

**Fig. S4** Variation of the  $J_{sc}$  of TiO<sub>2</sub> NRs/FTO-C/Cu<sub>2</sub>O/Cu PFC in 8 h.

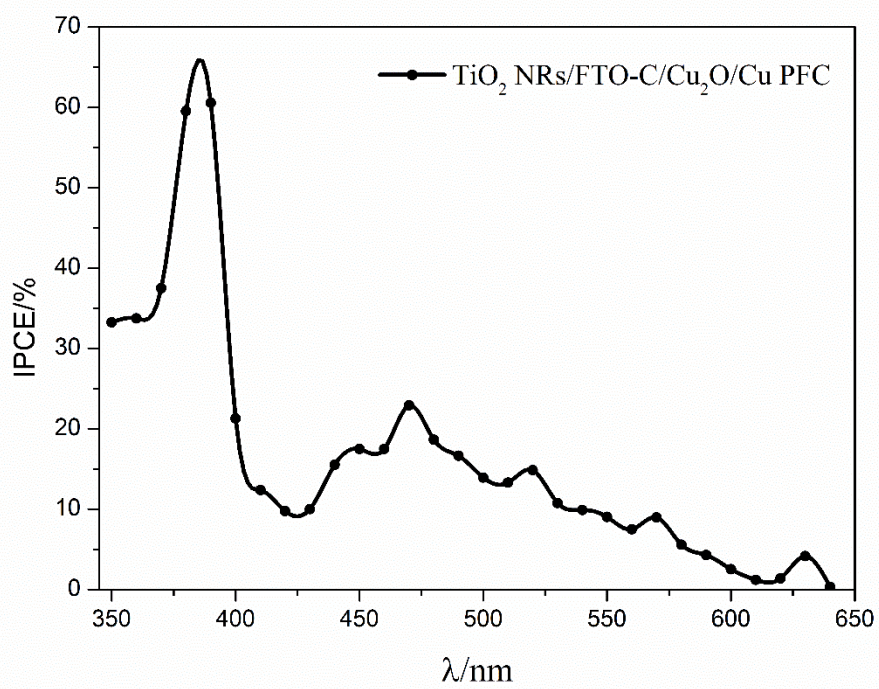

**Fig. S5** The IPCE of the TiO<sub>2</sub> NRs/FTO-C/Cu<sub>2</sub>O/Cu PFC.



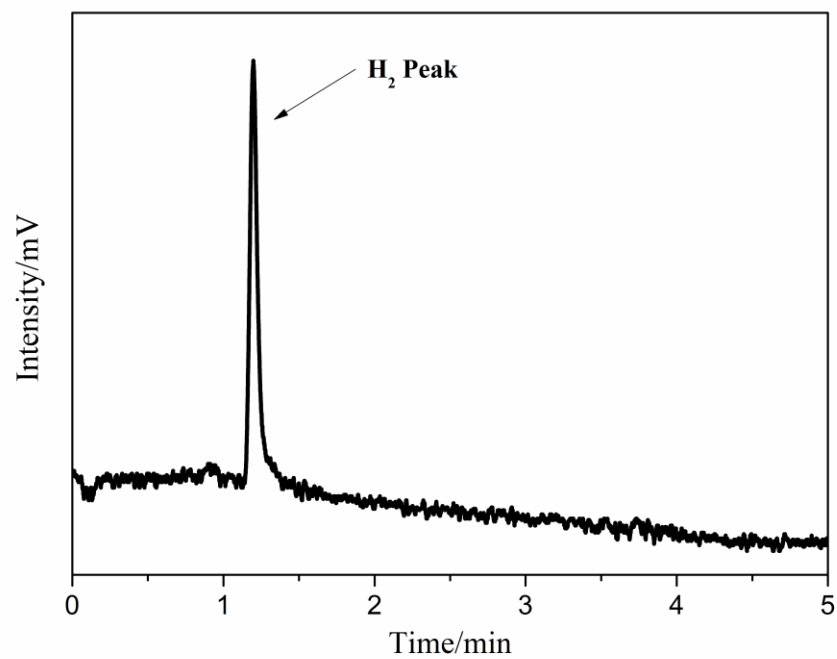

**Fig. S6** The gas-chromatography spectra of standard H<sub>2</sub> peak.
